# Supplementary material
Source: PubMed Central journal article supplement (PMC2786264)
Supplement: NIHMS151484-supplement-1_si_001.pdf [file NIHMS151484-supplement-1_si_001.pdf]

## Supporting Information

### Knowledge-based Characterization of Similarity Relationships in the Human Protein-Tyrosine Phosphatase Family for Rational Inhibitor Design

*Dušica Vidović, Stephan C. Schürer\**

#### Table of Contents:

1. Table S1. List of 102 PTP genes
2. Table S2. List of sequence to model template identities for 455 PTP structure models
3. Figure S1. Correlation between normalized and raw site similarities based on best models
4. Figure S2. Correlation between sequence similarity and mean and maximum site similarities of PTP gene combinations
5. Figure S3. Correlation between sequence identity and sequence similarity for PTP pairs
6. Figure S4. Distribution of sequence similarities, sequence identities and site similarities
7. Figure S5. Correlation between sequence and site similarities and their dependence on the average model template identity (for each PTP combination)
8. Figure S6. 3D PCA analysis of sequence and site similarities
9. Figure S7. Sequence similarity hierarchical clustering of classical PTPs with gene annotation
10. Figure S8. Site similarity hierarchical clustering of classical PTPs with gene annotation
11. Figure S9. 2D PCA analysis of sequence and site similarities for classical PTPs
12. Figure S10. 3D PCA analysis of sequence and site similarities for classical PTPs
13. Figure S11. Correlation between sequence and site similarities for classical PTPs
14. Figure S12. PTPN1 and PTPN3 site comparison
15. Figure S13. Correlation of calculated small molecule inhibitor activity-based PTP similarities vs. sequence and site similarities.
16. Figure S14. Hierarchical clustering of experimental  $pK_i$  values of PTPN1 inhibitors screened against a set of classical PTPs
17. Table S3. Proximity of PTPs to PTPN1 based on similarity by small molecule SAR, sequences, and sites.
18. Table S4. Sequence and site similarities of classical PTPs relative PTPN1
19. Figure S15. PTPN1 and PTPN2 catalytic site comparison

**Table S1.** List of collected PTP genes with their classification

| Gene    | ApprovedName                                                 | SubType                | Type      |
|---------|--------------------------------------------------------------|------------------------|-----------|
| PTPRA   | protein tyrosine phosphatase, receptor type, A               | classical receptor     | Classical |
| PTPRB   | protein tyrosine phosphatase, receptor type, B               | classical receptor     | Classical |
| PTPRC   | protein tyrosine phosphatase, receptor type, C               | classical receptor     | Classical |
| PTPRD   | protein tyrosine phosphatase, receptor type, D               | classical receptor     | Classical |
| PTPRE   | protein tyrosine phosphatase, receptor type, E               | classical receptor     | Classical |
| PTPRF   | protein tyrosine phosphatase, receptor type, F               | classical receptor     | Classical |
| PTPRG   | protein tyrosine phosphatase, receptor type, G               | classical receptor     | Classical |
| PTPRH   | protein tyrosine phosphatase, receptor type, H               | classical receptor     | Classical |
| PTPRJ   | protein tyrosine phosphatase, receptor type, J               | classical receptor     | Classical |
| PTPRK   | protein tyrosine phosphatase, receptor type, K               | classical receptor     | Classical |
| PTPRM   | protein tyrosine phosphatase, receptor type, M               | classical receptor     | Classical |
| PTPRN   | protein tyrosine phosphatase, receptor type, N               | classical receptor     | Classical |
| PTPRN2  | protein tyrosine phosphatase, receptor type, N polypeptide 2 | classical receptor     | Classical |
| PTPRO   | protein tyrosine phosphatase, receptor type, O               | classical receptor     | Classical |
| PTPRQ   | protein tyrosine phosphatase, receptor type, Q               | classical receptor     | Classical |
| PTPRR   | protein tyrosine phosphatase, receptor type, R               | classical receptor     | Classical |
| PTPRS   | protein tyrosine phosphatase, receptor type, S               | classical receptor     | Classical |
| PTPRT   | protein tyrosine phosphatase, receptor type, T               | classical receptor     | Classical |
| PTPRU   | protein tyrosine phosphatase, receptor type, U               | classical receptor     | Classical |
| PTPRZ1  | protein tyrosine phosphatase, receptor-type, Z polypeptide 1 | classical receptor     | Classical |
| PTPN1   | protein tyrosine phosphatase, non-receptor type 1            | classical non-receptor | Classical |
| PTPN2   | protein tyrosine phosphatase, non-receptor type 2            | classical non-receptor | Classical |
| PTPN3   | protein tyrosine phosphatase, non-receptor type 3            | classical non-receptor | Classical |
| PTPN4   | protein tyrosine phosphatase, non-receptor type 4            | classical non-receptor | Classical |
| PTPN5   | protein tyrosine phosphatase, non-receptor type 5            | classical non-receptor | Classical |
| PTPN6   | protein tyrosine phosphatase, non-receptor type 6            | classical non-receptor | Classical |
| PTPN7   | protein tyrosine phosphatase, non-receptor type 7            | classical non-receptor | Classical |
| PTPN9   | protein tyrosine phosphatase, non-receptor type 9            | classical non-receptor | Classical |
| PTPN11  | protein tyrosine phosphatase, non-receptor type 11           | classical non-receptor | Classical |
| PTPN12  | protein tyrosine phosphatase, non-receptor type 12           | classical non-receptor | Classical |
| PTPN13  | protein tyrosine phosphatase, non-receptor type 13           | classical non-receptor | Classical |
| PTPN14  | protein tyrosine phosphatase, non-receptor type 14           | classical non-receptor | Classical |
| PTPN18  | protein tyrosine phosphatase, non-receptor type 18           | classical non-receptor | Classical |
| PTPN20A | protein tyrosine phosphatase, non-receptor type 20A          | classical non-receptor | Classical |
| PTPN21  | protein tyrosine phosphatase, non-receptor type 21           | classical non-receptor | Classical |
| PTPN22  | protein tyrosine phosphatase, non-receptor type 22           | classical non-receptor | Classical |
| PTPN23  | protein tyrosine phosphatase, non-receptor type 23           | classical non-receptor | Classical |
| DUSP1   | dual specificity phosphatase 1                               | MKPs                   | DUSP      |
| DUSP2   | dual specificity phosphatase 2                               | MKPs                   | DUSP      |
| DUSP4   | dual specificity phosphatase 4                               | MKPs                   | DUSP      |
| DUSP5   | dual specificity phosphatase 5                               | MKPs                   | DUSP      |
| DUSP6   | dual specificity phosphatase 6                               | MKPs                   | DUSP      |
| DUSP7   | dual specificity phosphatase 7                               | MKPs                   | DUSP      |
| DUSP8   | dual specificity phosphatase 8                               | MKPs                   | DUSP      |
| DUSP9   | dual specificity phosphatase 9                               | MKPs                   | DUSP      |
| DUSP10  | dual specificity phosphatase 10                              | MKPs                   | DUSP      |
| DUSP16  | dual specificity phosphatase 16                              | MKPs                   | DUSP      |
| STYXL1  | serine/threonine/tyrosine interacting-like 1                 | MKPs                   | DUSP      |
| DUSP3   | dual specificity phosphatase 3                               | Atypical DUSP          | DUSP      |
| DUSP11  | dual specificity phosphatase 11                              | Atypical DUSP          | DUSP      |
| DUSP12  | dual specificity phosphatase 12                              | Atypical DUSP          | DUSP      |
| DUSP13  | dual specificity phosphatase 13                              | Atypical DUSP          | DUSP      |
| DUSP14  | dual specificity phosphatase 14                              | Atypical DUSP          | DUSP      |
| DUSP15  | dual specificity phosphatase 15                              | Atypical DUSP          | DUSP      |
| DUSP18  | dual specificity phosphatase 18                              | Atypical DUSP          | DUSP      |
| DUSP19  | dual specificity phosphatase 19                              | Atypical DUSP          | DUSP      |

|        |                                                                    |               |       |
|--------|--------------------------------------------------------------------|---------------|-------|
| DUSP21 | dual specificity phosphatase 21                                    | Atypical DUSP | DUSP  |
| DUSP22 | dual specificity phosphatase 22                                    | Atypical DUSP | DUSP  |
| PTPMT1 | protein tyrosine phosphatase, mitochondrial 1                      | Atypical DUSP | DUSP  |
| DUSP26 | dual specificity phosphatase 26                                    | Atypical DUSP | DUSP  |
| DUSP23 | dual specificity phosphatase 23                                    | Atypical DUSP | DUSP  |
| DUSP28 | dual specificity phosphatase 28                                    | Atypical DUSP | DUSP  |
| DUPD1  | dual specificity phosphatase and pro isomerase domain containing 1 | Atypical DUSP | DUSP  |
| EPM2A  | laforin                                                            | Atypical DUSP | DUSP  |
| RNGTT  | RNA guanylyltransferase and 5'-phosphatase                         | Atypical DUSP | DUSP  |
| STYX   | serine/threonine/tyrosine interacting protein                      | Atypical DUSP | DUSP  |
| SSH1   | slingshot homolog 1                                                | Slingshots    | DUSP  |
| SSH2   | slingshot homolog 2                                                | Slingshots    | DUSP  |
| SSH3   | slingshot homolog 3                                                | Slingshots    | DUSP  |
| PTP4A1 | protein tyrosine phosphatase type IVA                              | PRLs          | DUSP  |
| PTP4A2 | protein tyrosine phosphatase type IVA                              | PRLs          | DUSP  |
| PTP4A3 | protein tyrosine phosphatase type IVA                              | PRLs          | DUSP  |
| CDC14A | CDC14 cell division cycle 14 homolog A                             | CDC14s        | DUSP  |
| CDC14B | CDC14 cell division cycle 14 homolog B                             | CDC14s        | DUSP  |
| CDKN3  | cyclin-dependent kinase inhibitor 3                                | CDC14s        | DUSP  |
| PTPDC1 | protein tyrosine phosphatase domain containing 1                   | CDC14s        | DUSP  |
| PTEN   | phosphatase and tensin homolog                                     | PTENs         | DUSP  |
| TPTE2  | transmembrane phosphoinositide 3-phosphatase and tensin homolog 2  | PTENs         | DUSP  |
| TPTE   | transmembrane phosphatase with tensin homology                     | PTENs         | DUSP  |
| TNS1   | tensin 1                                                           | PTENs         | DUSP  |
| TENC1  | tensin like C1 domain containing phosphatase                       | PTENs         | DUSP  |
| TNS3   | tensin 3                                                           | PTENs         | DUSP  |
| MTM1   | myotubularin 1                                                     | Myotubularins | DUSP  |
| MTMR1  | myotubularin related protein 1                                     | Myotubularins | DUSP  |
| MTMR2  | myotubularin related protein 2                                     | Myotubularins | DUSP  |
| MTMR3  | myotubularin related protein 3                                     | Myotubularins | DUSP  |
| MTMR4  | myotubularin related protein 4                                     | Myotubularins | DUSP  |
| SBF1   | SET binding factor 1                                               | Myotubularins | DUSP  |
| MTMR6  | myotubularin related protein 6                                     | Myotubularins | DUSP  |
| MTMR7  | myotubularin related protein 7                                     | Myotubularins | DUSP  |
| MTMR8  | myotubularin related protein 8                                     | Myotubularins | DUSP  |
| MTMR9  | myotubularin related protein 9                                     | Myotubularins | DUSP  |
| MTMR10 | myotubularin related protein 10                                    | Myotubularins | DUSP  |
| MTMR11 | myotubularin related protein 11                                    | Myotubularins | DUSP  |
| MTMR12 | myotubularin related protein 12                                    | Myotubularins | DUSP  |
| SBF2   | SET binding factor 2                                               | Myotubularins | DUSP  |
| MTMR14 | myotubularin related protein 14                                    | Myotubularins | DUSP  |
| MTMR15 | myotubularin related protein 15                                    | Myotubularins | DUSP  |
| ACPI   | acid phosphatase 1                                                 | LMW           | LMW   |
| CDC25A | cell division cycle 25 homolog A                                   | cdc25         | cdc25 |
| CDC25B | cell division cycle 25 homolog B                                   | cdc25         | cdc25 |
| CDC25C | cell division cycle 25 homolog C                                   | cdc25         | cdc25 |

**Table S2.** Modeled sequence to template identities for 455 PTP domain structure models

| Gene    | Template | Identity | Gene    | Template | Identity | Gene   | Template | Identity |
|---------|----------|----------|---------|----------|----------|--------|----------|----------|
| PTPRA   | 2ooqA    | 0.51     | PTPN6   | 2h02A    | 0.30     | DUSP21 | 2g6zA    | 0.32     |
| PTPRA   | 2h02A    | 0.44     | PTPN6   | 2f71A    | 0.45     | DUSP21 | 1d5rA    | 0.14     |
| PTPRA   | 2g59A    | 0.40     | PTPN7   | 2ooqA    | 0.40     | DUSP22 | 1wrmA    | 1.00     |
| PTPRA   | 2f71A    | 0.36     | PTPN7   | 2g59A    | 0.36     | DUSP22 | 1yz4A    | 0.56     |
| PTPRA_2 | 2ooqA    | 0.44     | PTPN7   | 2h02A    | 0.44     | DUSP22 | 1zzwA    | 0.37     |
| PTPRA_2 | 2i1yA    | 0.38     | PTPN7   | 2f71A    | 0.42     | DUSP22 | 2g6zA    | 0.35     |
| PTPRA_2 | 2g59A    | 0.38     | PTPN9   | 2f71A    | 0.41     | DUSP22 | 1d5rA    | 0.12     |
| PTPRA_2 | 2h02A    | 0.37     | PTPN9   | 2ooqA    | 0.36     | PTPMT1 | 2imgA    | 0.22     |
| PTPRA_2 | 2f71A    | 0.34     | PTPN9   | 2h02A    | 0.39     | PTPMT1 | 1wrmA    | 0.21     |
| PTPRB   | 2h02A    | 1.00     | PTPN9   | 2g59A    | 0.39     | PTPMT1 | 1zzwA    | 0.21     |
| PTPRB   | 2g59A    | 0.52     | PTPN11  | 2ooqA    | 0.38     | PTPMT1 | 2g6zA    | 0.20     |
| PTPRB   | 2ooqA    | 0.49     | PTPN11  | 2h02A    | 0.36     | PTPMT1 | 1vhrA    | 0.19     |
| PTPRB   | 2f71A    | 0.40     | PTPN11  | 2f71A    | 0.42     | PTPMT1 | 1d5rA    | 0.14     |
| PTPRC   | 1ygrA    | 0.96     | PTPN11  | 2i1yA    | 0.38     | DUSP26 | 2e0tA    | 1.00     |
| PTPRC   | 2ooqA    | 0.48     | PTPN12  | 2ooqA    | 0.36     | DUSP26 | 2pq5A    | 0.54     |
| PTPRC   | 2h02A    | 0.45     | PTPN12  | 2g59A    | 0.36     | DUSP26 | 1vhrA    | 0.44     |
| PTPRC   | 2g59A    | 0.42     | PTPN12  | 2f71A    | 0.42     | DUSP26 | 2g6zA    | 0.36     |
| PTPRC   | 2f71A    | 0.34     | PTPN12  | 2i1yA    | 0.38     | DUSP26 | 1zzwA    | 0.33     |
| PTPRC_2 | 1ygrA    | 0.97     | PTPN12  | 2h02A    | 0.37     | DUSP26 | 1d5rA    | 0.13     |
| PTPRC_2 | 2ooqA    | 0.34     | PTPN13  | 1wchA    | 0.36     | DUSP23 | 2imgA    | 0.99     |
| PTPRC_2 | 2g59A    | 0.31     | PTPN13  | 2h02A    | 0.35     | DUSP23 | 1oheA    | 0.28     |
| PTPRC_2 | 2h02A    | 0.28     | PTPN13  | 2ooqA    | 0.99     | DUSP23 | 1d5rA    | 0.20     |
| PTPRC_2 | 2f71A    | 0.26     | PTPN13  | 2g59A    | 0.39     | DUSP23 | 2e0tA    | 0.19     |
| PTPRD   | 2ooqA    | 0.59     | PTPN13  | 2f71A    | 0.38     | DUSP23 | 1zzwA    | 0.18     |
| PTPRD   | 2g59A    | 0.45     | PTPN14  | 2f71A    | 0.34     | DUSP23 | 2g6zA    | 0.18     |
| PTPRD   | 2h02A    | 0.43     | PTPN14  | 2h02A    | 0.33     | DUSP28 | 2g6zA    | 0.35     |
| PTPRD   | 2f71A    | 0.40     | PTPN14  | 2ooqA    | 0.33     | DUSP28 | 2nt2A    | 0.35     |
| PTPRD_2 | 2ooqA    | 0.46     | PTPN14  | 2g59A    | 0.31     | DUSP28 | 1zzwA    | 0.30     |
| PTPRD_2 | 2h02A    | 0.41     | PTPN18  | 2h02A    | 0.36     | DUSP28 | 2r0bA    | 0.29     |
| PTPRD_2 | 2i1yA    | 0.40     | PTPN18  | 2ooqA    | 0.36     | DUSP28 | 1d5rA    | 0.14     |
| PTPRD_2 | 2f71A    | 0.35     | PTPN18  | 1wchA    | 0.36     | DUPD1  | 2e0tA    | 0.55     |
| PTPRE   | 2ooqA    | 0.53     | PTPN18  | 2f71A    | 0.35     | DUPD1  | 2pq5A    | 0.55     |
| PTPRE   | 2h02A    | 0.44     | PTPN18  | 2i1yA    | 0.35     | DUPD1  | 1vhrA    | 0.47     |
| PTPRE   | 2f71A    | 0.36     | PTPN20A | 1wchA    | 0.49     | DUPD1  | 1zzwA    | 0.31     |
| PTPRE_2 | 2ooqA    | 0.41     | PTPN20A | 2ooqA    | 0.39     | DUPD1  | 2g6zA    | 0.30     |
| PTPRE_2 | 2h02A    | 0.39     | PTPN20A | 2h02A    | 0.38     | DUPD1  | 1d5rA    | 0.11     |
| PTPRE_2 | 2i1yA    | 0.35     | PTPN20A | 2f71A    | 0.36     | EPM2A  | 2g6zA    | 0.26     |
| PTPRE_2 | 2f71A    | 0.29     | PTPN21  | 2f71A    | 0.34     | RNGTT  | 2imgA    | 0.22     |
| PTPRF   | 2ooqA    | 0.59     | PTPN21  | 2ooqA    | 0.34     | RNGTT  | 1xm2A    | 0.21     |
| PTPRF   | 2g59A    | 0.47     | PTPN21  | 1ygrA    | 0.33     | RNGTT  | 2pq5A    | 0.14     |
| PTPRF   | 2h02A    | 0.46     | PTPN21  | 1wchA    | 0.33     | RNGTT  | 1d5rA    | 0.13     |
| PTPRF   | 2f71A    | 0.41     | PTPN21  | 2h02A    | 0.32     | RNGTT  | 1zzwA    | 0.12     |
| PTPRF_2 | 2ooqA    | 0.45     | PTPN22  | 2ooqA    | 0.41     | RNGTT  | 2g6zA    | 0.11     |
| PTPRF_2 | 2h02A    | 0.41     | PTPN22  | 2g59A    | 0.39     | RNGTT  | 2esbA    | 0.11     |
| PTPRF_2 | 2i1yA    | 0.38     | PTPN22  | 2i1yA    | 0.38     | STYX   | 2r0bA    | 1.00     |
| PTPRF_2 | 2f71A    | 0.33     | PTPN22  | 2f71A    | 0.37     | STYX   | 1zzwA    | 0.35     |

|         |       |      |        |       |      |        |       |      |
|---------|-------|------|--------|-------|------|--------|-------|------|
| PTPRG   | 2ooqA | 0.49 | PTPN22 | 2h02A | 0.36 | STYX   | 2g6zA | 0.34 |
| PTPRG   | 2h02A | 0.43 | PTPN23 | 1wchA | 0.34 | STYX   | 2nt2A | 0.33 |
| PTPRG   | 2g59A | 0.43 | PTPN23 | 2f71A | 0.33 | STYX   | 1d5rA | 0.13 |
| PTPRG   | 2f71A | 0.37 | PTPN23 | 2h02A | 0.30 | SSH1   | 2nt2A | 0.74 |
| PTPRG 2 | 2ooqA | 0.31 | PTPN23 | 2ooqA | 0.30 | SSH1   | 2g6zA | 0.40 |
| PTPRG 2 | 2g59A | 0.29 | PTPN23 | 2g59A | 0.30 | SSH1   | 1zzwA | 0.38 |
| PTPRG 2 | 2f71A | 0.28 | DUSP1  | 2g6zA | 0.65 | SSH1   | 2r0bA | 0.34 |
| PTPRG 2 | 2h02A | 0.26 | DUSP1  | 1zzwA | 0.43 | SSH1   | 1d5rA | 0.12 |
| PTPRH   | 2h02A | 0.49 | DUSP1  | 2r0bA | 0.36 | SSH2   | 2nt2A | 0.99 |
| PTPRH   | 2g59A | 0.49 | DUSP1  | 2nt2A | 0.35 | SSH2   | 1zzwA | 0.36 |
| PTPRH   | 2ooqA | 0.44 | DUSP1  | 1d5rA | 0.15 | SSH2   | 2g6zA | 0.35 |
| PTPRH   | 2f71A | 0.38 | DUSP2  | 2g6zA | 0.58 | SSH2   | 2r0bA | 0.33 |
| PTPRJ   | 2h02A | 0.56 | DUSP2  | 1zzwA | 0.44 | SSH2   | 1d5rA | 0.15 |
| PTPRJ   | 2ooqA | 0.50 | DUSP2  | 2nt2A | 0.39 | SSH3   | 2nt2A | 0.55 |
| PTPRJ   | 2g59A | 0.48 | DUSP2  | 2r0bA | 0.38 | SSH3   | 2e0tA | 0.36 |
| PTPRJ   | 2f71A | 0.36 | DUSP2  | 1d5rA | 0.15 | SSH3   | 1zzwA | 0.33 |
| PTPRK   | 2ooqA | 0.77 | DUSP4  | 2g6zA | 0.65 | SSH3   | 2g6zA | 0.33 |
| PTPRK   | 2h02A | 0.46 | DUSP4  | 1zzwA | 0.43 | SSH3   | 1d5rA | 0.15 |
| PTPRK   | 2g59A | 0.46 | DUSP4  | 2r0bA | 0.33 | PTP4A1 | 1xm2A | 0.98 |
| PTPRK   | 2ilyA | 0.39 | DUSP4  | 2nt2A | 0.32 | PTP4A1 | 1d5rA | 0.19 |
| PTPRK   | 2f71A | 0.35 | DUSP4  | 1d5rA | 0.15 | PTP4A1 | 2g6zA | 0.18 |
| PTPRK 2 | 2ooqA | 0.32 | DUSP5  | 2g6zA | 0.99 | PTP4A1 | 2r0bA | 0.17 |
| PTPRK 2 | 2h02A | 0.30 | DUSP5  | 1zzwA | 0.36 | PTP4A1 | 1zzwA | 0.15 |
| PTPRK 2 | 2ilyA | 0.30 | DUSP5  | 1d5rA | 0.15 | PTP4A1 | 2nt2A | 0.14 |
| PTPRK 2 | 2f71A | 0.27 | DUSP6  | 1zzwA | 0.49 | PTP4A2 | 1xm2A | 0.87 |
| PTPRM   | 2ooqA | 0.81 | DUSP6  | 2g6zA | 0.45 | PTP4A2 | 1d5rA | 0.19 |
| PTPRM   | 2h02A | 0.47 | DUSP6  | 2r0bA | 0.33 | PTP4A2 | 2g6zA | 0.19 |
| PTPRM   | 2g59A | 0.46 | DUSP6  | 2nt2A | 0.32 | PTP4A2 | 2r0bA | 0.18 |
| PTPRM   | 2f71A | 0.36 | DUSP6  | 1d5rA | 0.14 | PTP4A2 | 1zzwA | 0.14 |
| PTPRM 2 | 2ilyA | 0.33 | DUSP7  | 1zzwA | 0.48 | PTP4A2 | 2nt2A | 0.13 |
| PTPRM 2 | 2ooqA | 0.32 | DUSP7  | 2g6zA | 0.45 | PTP4A3 | 1xm2A | 0.79 |
| PTPRM 2 | 2h02A | 0.30 | DUSP7  | 2nt2A | 0.34 | PTP4A3 | 1d5rA | 0.18 |
| PTPRM 2 | 2f71A | 0.29 | DUSP7  | 2r0bA | 0.34 | PTP4A3 | 2g6zA | 0.17 |
| PTPRN   | 2ilyA | 0.99 | DUSP7  | 1d5rA | 0.15 | PTP4A3 | 2r0bA | 0.17 |
| PTPRN   | 2ooqA | 0.40 | DUSP8  | 1zzwA | 0.43 | PTP4A3 | 1zzwA | 0.15 |
| PTPRN   | 2f71A | 0.38 | DUSP8  | 2g6zA | 0.36 | PTP4A3 | 2nt2A | 0.14 |
| PTPRN   | 2h02A | 0.36 | DUSP8  | 2r0bA | 0.36 | CDC14A | 1oheA | 0.70 |
| PTPRN2  | 2ilyA | 0.80 | DUSP8  | 2e0tA | 0.33 | CDC14A | 2imgA | 0.23 |
| PTPRN2  | 2ooqA | 0.40 | DUSP8  | 1d5rA | 0.14 | CDC14A | 2r0bA | 0.17 |
| PTPRN2  | 2f71A | 0.39 | DUSP9  | 1zzwA | 0.49 | CDC14B | 1oheA | 0.99 |
| PTPRN2  | 2h02A | 0.36 | DUSP9  | 2g6zA | 0.45 | CDC14B | 2imgA | 0.24 |
| PTPRO   | 2g59A | 1.00 | DUSP9  | 2nt2A | 0.37 | CDC14B | 1zzwA | 0.17 |
| PTPRO   | 2h02A | 0.53 | DUSP9  | 2r0bA | 0.34 | CDKN3  | 1fpzA | 0.99 |
| PTPRO   | 2ooqA | 0.47 | DUSP9  | 1d5rA | 0.18 | CDKN3  | 1xm2A | 0.24 |
| PTPRO   | 2f71A | 0.38 | DUSP10 | 1zzwA | 1.00 | CDKN3  | 1zzwA | 0.16 |
| PTPRQ   | 2g59A | 0.51 | DUSP10 | 2g6zA | 0.36 | CDKN3  | 2g59A | 0.16 |
| PTPRQ   | 2h02A | 0.50 | DUSP10 | 2nt2A | 0.35 | CDKN3  | 1d5rA | 0.15 |
| PTPRQ   | 2ooqA | 0.42 | DUSP10 | 2r0bA | 0.34 | PTPDC1 | 1oheA | 0.25 |
| PTPRQ   | 2f71A | 0.34 | DUSP10 | 1d5rA | 0.15 | PTPDC1 | 2imgA | 0.25 |

|          |       |      |        |       |      |        |       |      |
|----------|-------|------|--------|-------|------|--------|-------|------|
| PTPRR    | 2ooqA | 0.44 | DUSP16 | 1zzwA | 0.42 | PTPDC1 | 1d5rA | 0.21 |
| PTPRR    | 2g59A | 0.42 | DUSP16 | 2g6zA | 0.40 | PTPDC1 | 1zzwA | 0.18 |
| PTPRR    | 2h02A | 0.40 | DUSP16 | 2e0tA | 0.35 | PTPDC1 | 2e0tA | 0.17 |
| PTPRR    | 2f71A | 0.34 | DUSP16 | 2nt2A | 0.34 | PTPDC1 | 1vhrA | 0.16 |
| PTPRR    | 2i1yA | 0.33 | DUSP16 | 1d5rA | 0.15 | PTEN   | 1d5rA | 1.00 |
| PTPRS    | 2ooqA | 0.59 | STYXL1 | 2g6zA | 0.29 | PTEN   | 1zzwA | 0.18 |
| PTPRS    | 2g59A | 0.46 | STYXL1 | 1zzwA | 0.27 | PTEN   | 2imgA | 0.15 |
| PTPRS    | 2h02A | 0.44 | STYXL1 | 2r0bA | 0.26 | PTEN   | 2g6zA | 0.13 |
| PTPRS    | 2f71A | 0.40 | STYXL1 | 2nt2A | 0.26 | TPTE2  | 1d5rA | 0.49 |
| PTPRS_2  | 2ooqA | 0.46 | STYXL1 | 1wrmA | 0.25 | TPTE2  | 2imgA | 0.20 |
| PTPRS_2  | 2h02A | 0.41 | STYXL1 | 2e0tA | 0.25 | TPTE2  | 1vhrA | 0.14 |
| PTPRS_2  | 2i1yA | 0.39 | STYXL1 | 1d5rA | 0.14 | TPTE2  | 1zzwA | 0.13 |
| PTPRS_2  | 2f71A | 0.34 | DUSP3  | 1vhrA | 1.00 | TPTE2  | 2g6zA | 0.12 |
| PTPRT    | 2ooqA | 1.00 | DUSP3  | 2e0tA | 0.44 | TPTE   | 1d5rA | 0.47 |
| PTPRT    | 2h02A | 0.49 | DUSP3  | 2g6zA | 0.33 | TPTE   | 1xm2A | 0.14 |
| PTPRT    | 2g59A | 0.46 | DUSP3  | 1zzwA | 0.32 | TPTE   | 2g6zA | 0.13 |
| PTPRT    | 2f71A | 0.37 | DUSP3  | 1d5rA | 0.13 | TPTE   | 1zzwA | 0.12 |
| PTPRT_2  | 2h02A | 0.31 | DUSP11 | 2e0tA | 0.17 | TNS1   | 1wvhA | 0.90 |
| PTPRT_2  | 2ooqA | 0.31 | DUSP11 | 1d5rA | 0.16 | TENC1  | 1d5rA | 0.32 |
| PTPRT_2  | 2f71A | 0.28 | DUSP11 | 2imgA | 0.15 | TENC1  | 1xm2A | 0.12 |
| PTPRU    | 2ooqA | 0.62 | DUSP11 | 1zzwA | 0.13 | TENC1  | 1fpzA | 0.11 |
| PTPRU    | 2h02A | 0.39 | DUSP11 | 1vhrA | 0.11 | TENC1  | 1zzwA | 0.08 |
| PTPRU    | 2g59A | 0.38 | DUSP12 | 2g6zA | 0.32 | TENC1  | 2g6zA | 0.08 |
| PTPRU    | 2f71A | 0.29 | DUSP12 | 1wrmA | 0.31 | TNS3   | 1wvhA | 0.75 |
| PTPRU_2  | 2ooqA | 0.32 | DUSP12 | 2e0tA | 0.31 | MTM1   | 1zsqA | 0.73 |
| PTPRU_2  | 2i1yA | 0.30 | DUSP12 | 1zzwA | 0.27 | MTM1   | 1lw3A | 0.73 |
| PTPRU_2  | 2h02A | 0.29 | DUSP12 | 2r0bA | 0.27 | MTMR1  | 1zsqA | 0.77 |
| PTPRU_2  | 2f71A | 0.27 | DUSP12 | 2nt2A | 0.26 | MTMR1  | 1lw3A | 0.77 |
| PTPRZ1   | 2ooqA | 0.50 | DUSP12 | 1d5rA | 0.13 | MTMR2  | 1zsqA | 1.00 |
| PTPRZ1   | 2h02A | 0.45 | DUSP13 | 2pq5A | 1.00 | MTMR2  | 1lw3A | 1.00 |
| PTPRZ1   | 2i1yA | 0.38 | DUSP13 | 2e0tA | 0.54 | MTMR3  | 1zsqA | 0.43 |
| PTPRZ1   | 2f71A | 0.36 | DUSP13 | 1vhrA | 0.44 | MTMR3  | 1lw3A | 0.43 |
| PTPRZ1_2 | 2ooqA | 0.31 | DUSP13 | 1zzwA | 0.31 | MTMR4  | 1zsqA | 0.41 |
| PTPRZ1_2 | 2g59A | 0.29 | DUSP13 | 2g6zA | 0.30 | MTMR4  | 1lw3A | 0.41 |
| PTPRZ1_2 | 2f71A | 0.27 | DUSP13 | 1d5rA | 0.12 | SBF1   | 1lw3A | 0.28 |
| PTPRZ1_2 | 2h02A | 0.26 | DUSP14 | 2esbA | 0.51 | MTMR6  | 1zsqA | 0.44 |
| PTPN1    | 2f71A | 1.00 | DUSP14 | 2e0tA | 0.39 | MTMR6  | 1lw3A | 0.44 |
| PTPN1    | 2h02A | 0.39 | DUSP14 | 2g6zA | 0.36 | MTMR7  | 1zsqA | 0.45 |
| PTPN1    | 2ooqA | 0.37 | DUSP14 | 1zzwA | 0.34 | MTMR7  | 1lw3A | 0.45 |
| PTPN1    | 2g59A | 0.36 | DUSP14 | 1d5rA | 0.13 | MTMR8  | 1lw3A | 0.46 |
| PTPN2    | 2f71A | 0.72 | DUSP15 | 1yz4A | 0.97 | MTMR8  | 1zsqA | 0.45 |
| PTPN2    | 2h02A | 0.38 | DUSP15 | 1wrmA | 0.57 | MTMR9  | 1zsqA | 0.41 |
| PTPN2    | 2ooqA | 0.37 | DUSP15 | 1zzwA | 0.36 | MTMR9  | 1lw3A | 0.41 |
| PTPN2    | 2g59A | 0.37 | DUSP15 | 2g6zA | 0.36 | MTMR10 | 1zsqA | 0.27 |
| PTPN3    | 2f71A | 0.37 | DUSP15 | 1d5rA | 0.13 | MTMR10 | 1lw3A | 0.27 |
| PTPN3    | 2ooqA | 0.37 | DUSP18 | 2esbA | 1.00 | MTMR11 | 1zsqA | 0.25 |
| PTPN3    | 2g59A | 0.37 | DUSP18 | 2e0tA | 0.37 | MTMR11 | 1lw3A | 0.25 |
| PTPN3    | 2h02A | 0.35 | DUSP18 | 1zzwA | 0.34 | MTMR12 | 1lw3A | 0.28 |
| PTPN4    | 2ooqA | 0.41 | DUSP18 | 2g6zA | 0.33 | MTMR12 | 1zsqA | 0.27 |

|       |       |      |        |       |      |        |       |      |
|-------|-------|------|--------|-------|------|--------|-------|------|
| PTPN4 | 2f71A | 0.39 | DUSP18 | 1d5rA | 0.15 | SBF2   | 1lw3A | 0.28 |
| PTPN4 | 2g59A | 0.39 | DUSP19 | 1zzwA | 0.40 | MTMR14 | 1vhrA | 0.21 |
| PTPN4 | 2h02A | 0.37 | DUSP19 | 2r0bA | 0.37 | MTMR14 | 1zzwA | 0.16 |
| PTPN5 | 2ooqA | 0.44 | DUSP19 | 2g6zA | 0.36 | ACP1   | 5pntA | 1.00 |
| PTPN5 | 2g59A | 0.39 | DUSP19 | 1d5rA | 0.13 | CDC25A | 1c25A | 1.00 |
| PTPN5 | 2h02A | 0.36 | DUSP21 | 2esbA | 0.75 | CDC25B | 1c25A | 0.69 |
| PTPN5 | 2f71A | 0.30 | DUSP21 | 2e0tA | 0.35 | CDC25C | 1c25A | 0.66 |
| PTPN6 | 2ooqA | 0.45 | DUSP21 | 1zzwA | 0.32 |        |       |      |

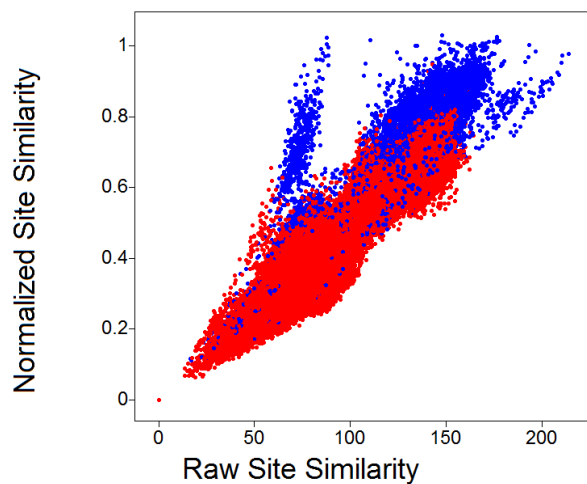

**Figure S1.** Correlation between normalized and raw site similarity values for all PTP combinations (455 models). Blue sites are modeled by same template and red sites are modeled by different templates.

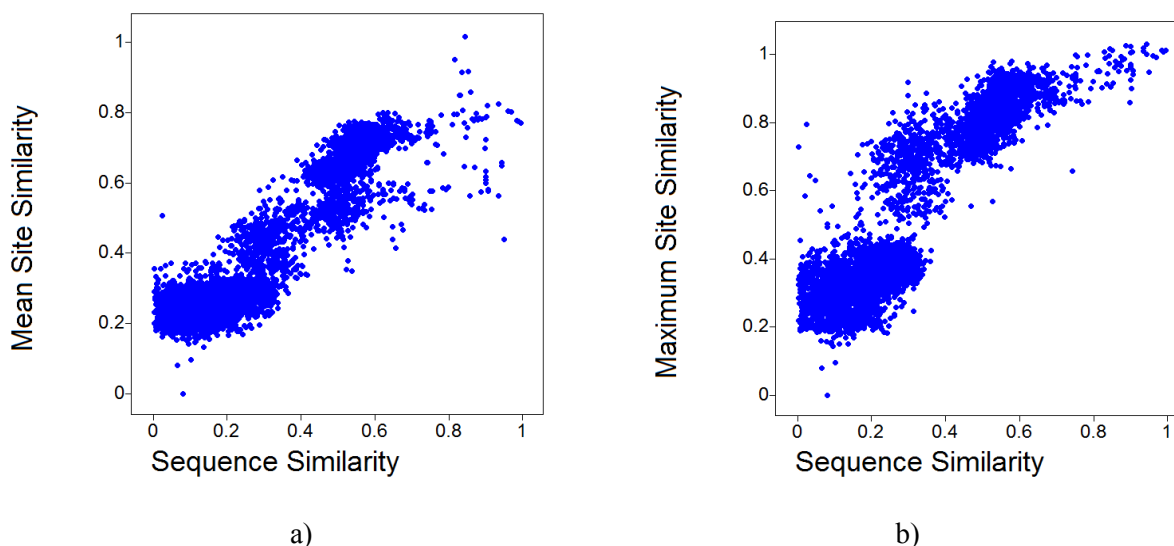

**Figure S2.** Sequence similarity versus: a) mean site similarity between gene combinations and b) maximum site similarity between gene combinations (each gene is presented by ensemble of binding sites)

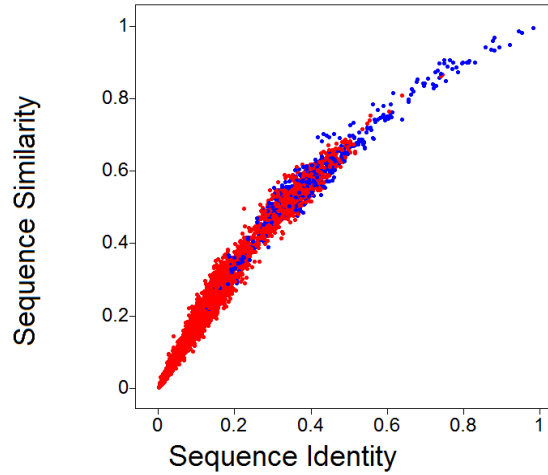

**Figure S3.** Sequence similarity versus sequence identity for PTP combinations (blue data represent site pairs where the corresponding models were generated with the same template while for red data points the templates were different).

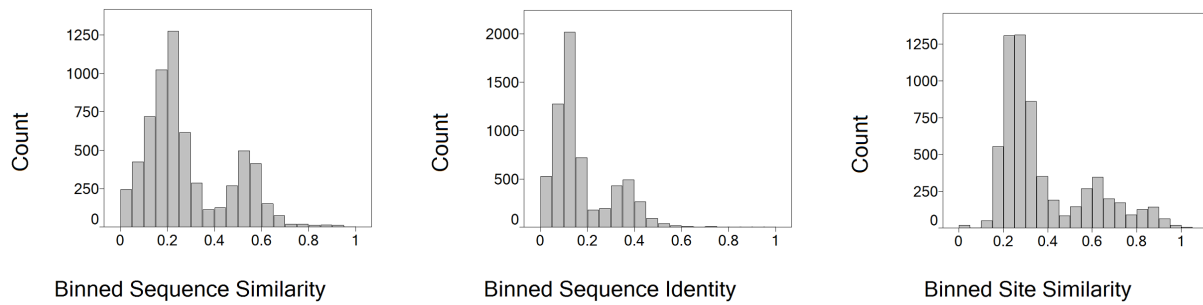

**Figure S4.** Histograms of sequence similarity, sequence identity, and site similarity pairs, respectively. Relative to the modes of the respective populations, the site similarity distribution contains a sub-population of highly similar pairs, which correspond to average lower sequence similarities (or identities).



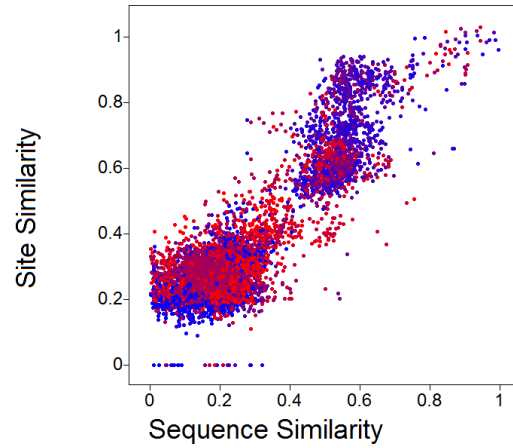

**Figure S5.** Correlation between (best model) site similarity and sequence similarity for all human PTP combinations and their dependence on average PDB template identity (higher average identity of the PTP domain to the PDB template is represented by increasing intensity of blue, lower average template identity as red).

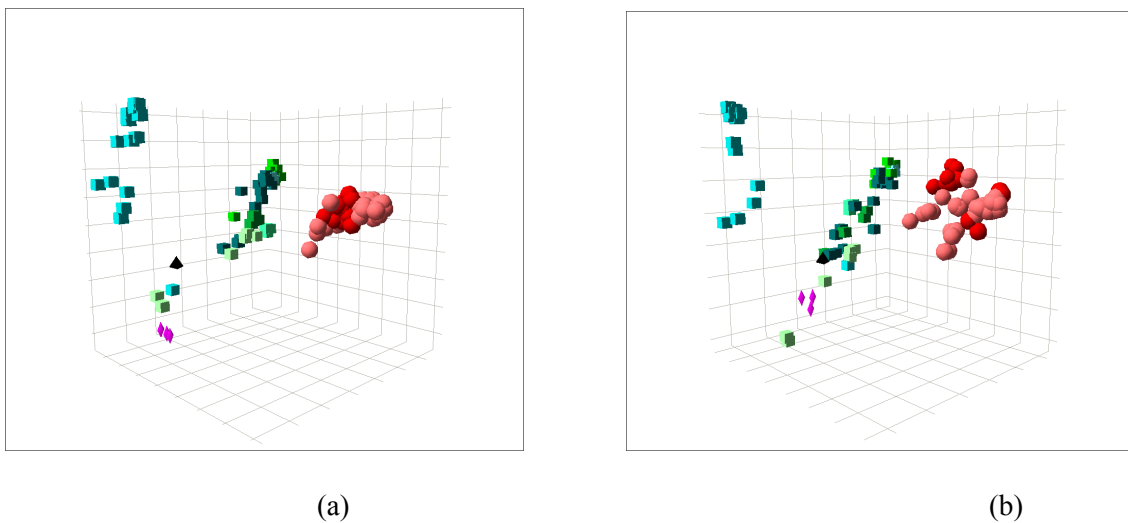

**Figure S6.** Three component PCA analysis of (a) sequence and (b) site similarities. 81.8% and 86.7% of variability is preserved for sequence and site similarity, respectively. Colors correspond to different PTP subtypes.

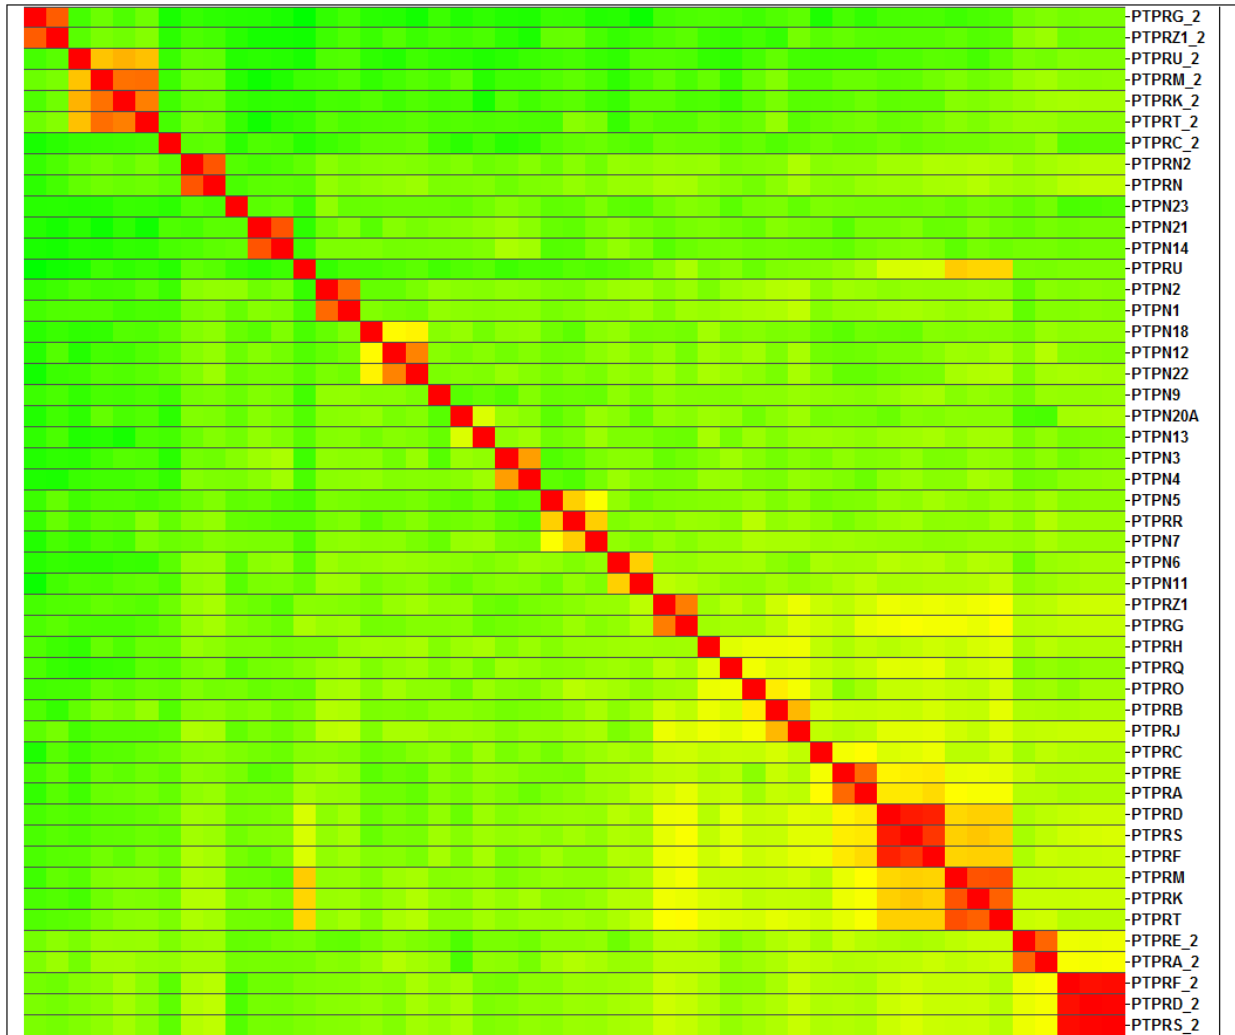

**Figure S7.** Hierarchical clustering of sequence similarities of 49 classical PTP domains (PTP domains annotated by genes).

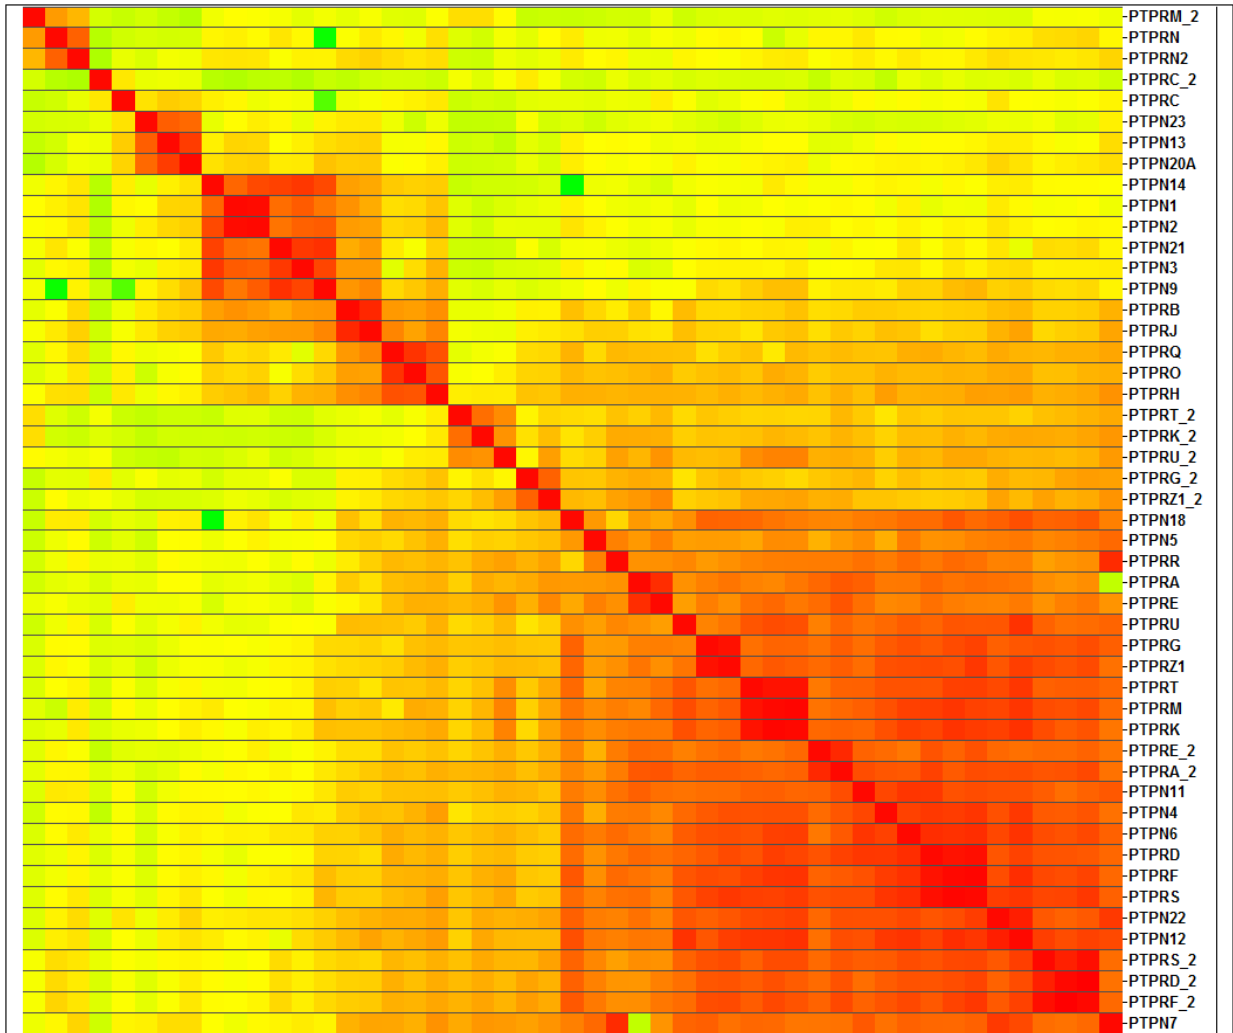

**Figure S8.** Hierarchical clustering of binding site similarities of 49 classical PTP domains (PTP domains annotated by genes).

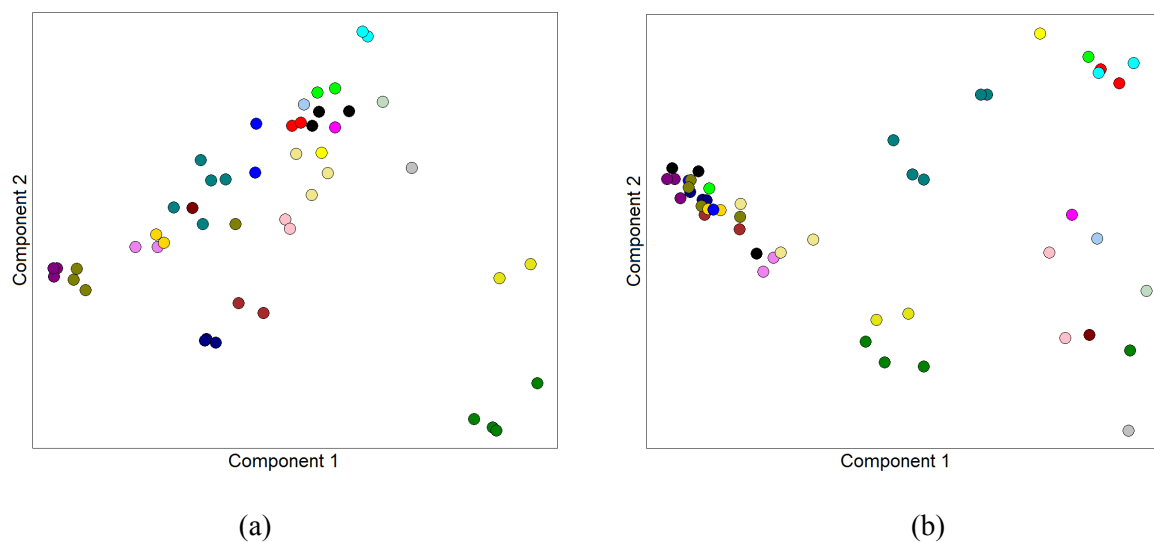

**Figure S9.** Two components PCA analysis of (a) sequence and (b) site similarities. 42.9% and 77.9% of variability is preserved for sequence and site similarity of classical PTPs, respectively. Colors correspond to different classical PTP subtypes.

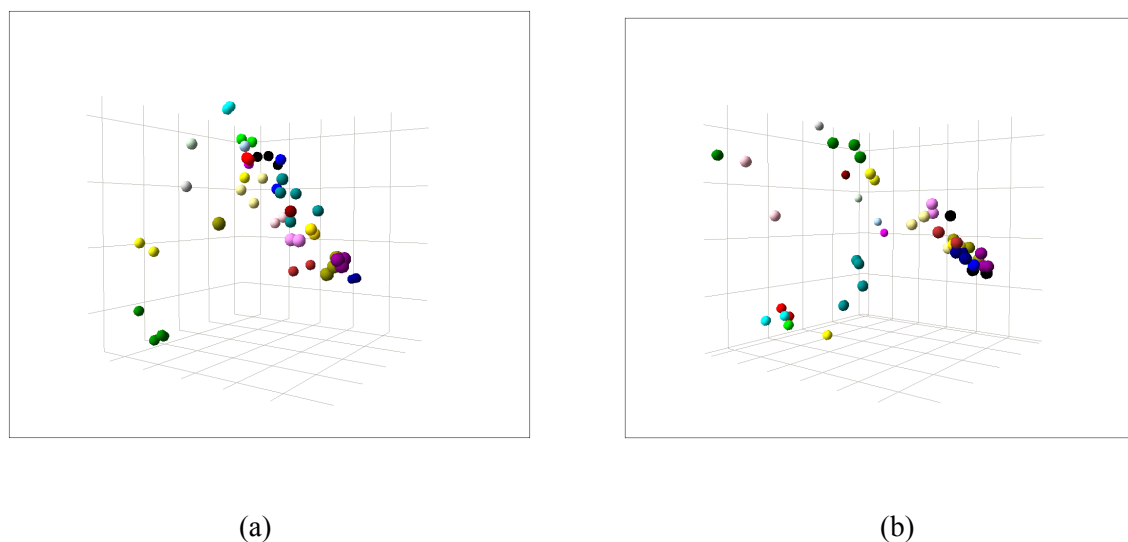

**Figure S10.** Three components PCA analysis of (a) sequence and (b) site similarities. 51.2% and 82.5% of variability is preserved for sequence and site similarity of classical PTPs, respectively. Colors correspond to different classical PTP subtypes.

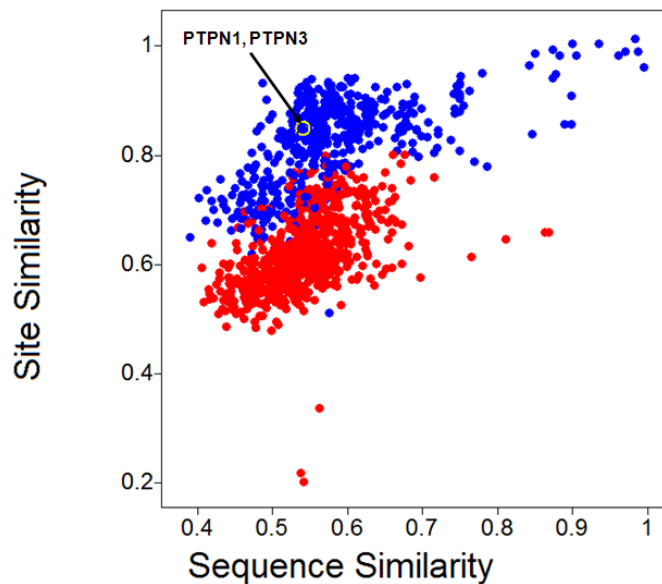

**Figure S11.** Correlation between site and sequence similarities for classical PTP combinations. Blue data present site pairs where the corresponding models were generated with the same template while for red data points the templates were different.

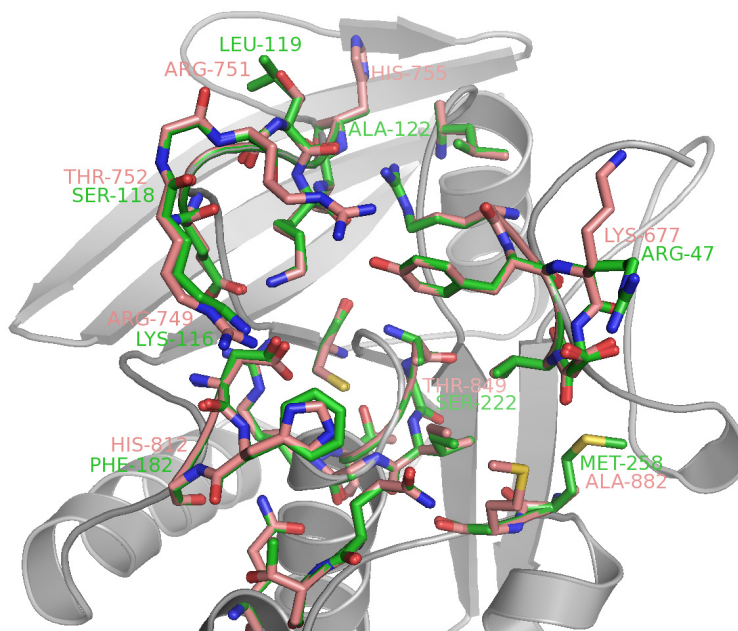

**Figure S12.** Despite relatively lower sequence similarity of 0.56, the catalytic binding sites of PTPN1 (green residues) and PTPN3 (pink residues) are much more conserved (site similarity 0.87). The majority of the residues (20 out of 29) are identical while most of the different residues exhibit similar physicochemical properties (such as Lys and Arg or Thr and Ser, which are aligned in the overlaid sites respectively).

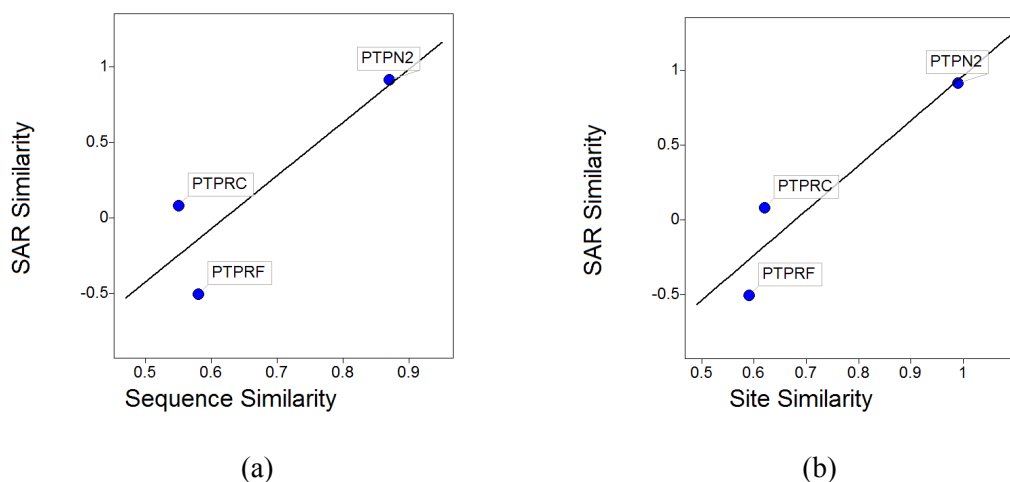

**Figure S13.** Correlation of calculated small molecule activity-based similarity versus (a) sequence and (b) site similarity; relative to PTPN1 as reference.

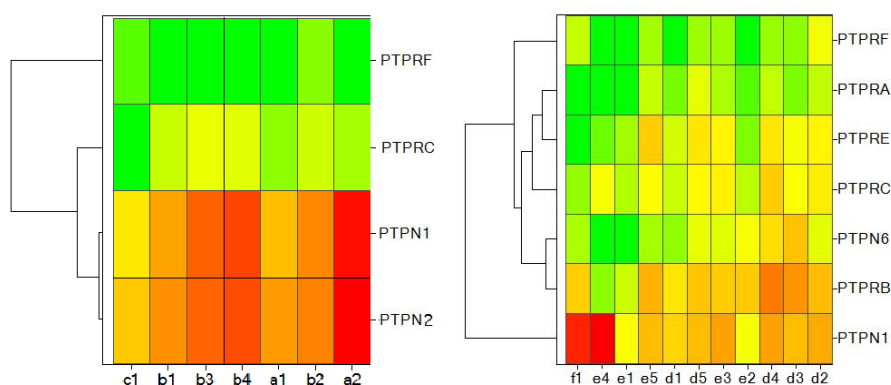

**Figure S14.** Hierarchical clustering of experimental activities of PTP1B inhibitors against a panel of classical PTPs.

**Table S3.** Proximity of PTPs to PTPN1 based on similarity by small molecule SAR, sequences, and sites.

| Order derived from SAR data | Order by sequence similarity |           | Order by site similarity |           |
|-----------------------------|------------------------------|-----------|--------------------------|-----------|
| PTPN2                       | PTPN2                        | correct   | PTPN2                    | correct   |
| PTPRB                       | PTPRB                        | correct   | PTPRB                    | correct   |
| PTPN6                       | PTPRF                        | incorrect | PTPN6                    | correct   |
| PTPRC                       | PTPRA                        | incorrect | PTPRC                    | correct   |
| PTPRE                       | PTPRE                        | correct   | PTPRE                    | correct   |
| PTPRA                       | PTPN6                        | incorrect | PTPRF                    | incorrect |
| PTPRF                       | PTPRC                        | incorrect | PTPRA                    | incorrect |

**Table S4.** Sequence and Site Similarities of classical PTPs to PTPN1 (ordered high to low similarity)

| Gene     | Sequence Similarity | Gene     | Site Similarity |
|----------|---------------------|----------|-----------------|
| PTPN2    | 0.87                | PTPN2    | 0.99            |
| PTPRJ    | 0.62                | PTPN3    | 0.87            |
| PTPRB    | 0.6                 | PTPN14   | 0.85            |
| PTPRO    | 0.59                | PTPN21   | 0.84            |
| PTPRS    | 0.59                | PTPN9    | 0.82            |
| PTPRT    | 0.59                | PTPRB    | 0.78            |
| PTPRD    | 0.58                | PTPRJ    | 0.74            |
| PTPRQ    | 0.58                | PTPRH    | 0.7             |
| PTPRF    | 0.58                | PTPN20A  | 0.68            |
| PTPRG    | 0.58                | PTPN13   | 0.67            |
| PTPRK    | 0.58                | PTPRO    | 0.67            |
| PTPN11   | 0.58                | PTPRQ    | 0.66            |
| PTPRH    | 0.57                | PTPRN2   | 0.65            |
| PTPRA    | 0.57                | PTPN22   | 0.64            |
| PTPRM    | 0.57                | PTPRN    | 0.63            |
| PTPRE    | 0.57                | PTPN6    | 0.63            |
| PTPN9    | 0.57                | PTPN18   | 0.63            |
| PTPN7    | 0.56                | PTPRC    | 0.62            |
| PTPN6    | 0.56                | PTPRA 2  | 0.62            |
| PTPN4    | 0.56                | PTPN12   | 0.61            |
| PTPN3    | 0.56                | PTPN11   | 0.61            |
| PTPN20A  | 0.56                | PTPN23   | 0.61            |
| PTPRD 2  | 0.56                | PTPRF 2  | 0.61            |
| PTPN13   | 0.55                | PTPRM 2  | 0.61            |
| PTPRS 2  | 0.55                | PTPRG    | 0.61            |
| PTPN21   | 0.55                | PTPRM    | 0.61            |
| PTPRA 2  | 0.55                | PTPRE 2  | 0.61            |
| PTPRC    | 0.55                | PTPN5    | 0.6             |
| PTPRF 2  | 0.55                | PTPRD 2  | 0.6             |
| PTPRN    | 0.55                | PTPRK    | 0.6             |
| PTPRZ1   | 0.55                | PTPRS 2  | 0.6             |
| PTPN18   | 0.55                | PTPRE    | 0.59            |
| PTPRR    | 0.55                | PTPRF    | 0.59            |
| PTPN14   | 0.54                | PTPN4    | 0.59            |
| PTPRN2   | 0.54                | PTPRT    | 0.59            |
| PTPN5    | 0.53                | PTPRS    | 0.59            |
| PTPN12   | 0.53                | PTPRR    | 0.58            |
| PTPN22   | 0.52                | PTPN7    | 0.58            |
| PTPN23   | 0.51                | PTPRZ1   | 0.58            |
| PTPRE 2  | 0.51                | PTPRZ1 2 | 0.58            |
| PTPRM 2  | 0.49                | PTPRA    | 0.58            |
| PTPRU 2  | 0.49                | PTPRD    | 0.57            |
| PTPRZ1 2 | 0.49                | PTPRG 2  | 0.57            |
| PTPRT 2  | 0.48                | PTPRU    | 0.57            |
| PTPRU    | 0.48                | PTPRT 2  | 0.56            |
| PTPRC 2  | 0.48                | PTPRU 2  | 0.55            |
| PTPRK 2  | 0.47                | PTPRK 2  | 0.53            |
| PTPRG 2  | 0.47                | PTPRC 2  | 0.48            |

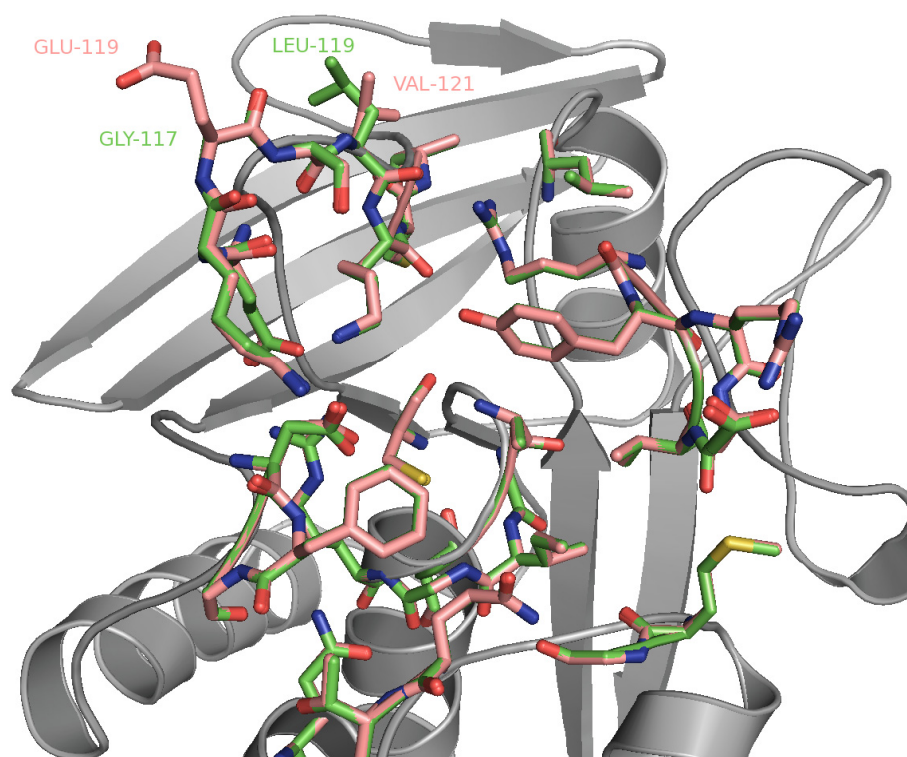

**Figure S15.** Binding sites of PTPN1 (green residues) and PTPN2 (pink residues) are extremely similar and the development of selective inhibitors is consequently very difficult. With the binding sites defined by 29 residues only two pairs of corresponding residues are different (Gly117 and Leu119 in PTPN1 vs. Glu119 and Val121 in PTPN2).
